# Supplementary material for: Sensory lesioning induces microglial synapse elimination via ADAM10 and fractalkine signaling
Source: Springer Nature journal article supplement (doi:10.1038/s41593-019-0419-y), 2019-06-17
Supplement: 41593_2019_419_MOESM1_ESM.pdf [file 41593_2019_419_MOESM1_ESM.pdf]

In the format provided by the authors and unedited.

# Sensory lesioning induces microglial synapse elimination via ADAM10 and fractalkine signaling

Georgia Gunner<sup>1</sup>, Lucas Cheadle<sup>2,9</sup>, Kasey M. Johnson<sup>1,9</sup>, Pinar Ayata<sup>3,4</sup>, Ana Badimon<sup>3</sup>, Erica Mondo<sup>1</sup>, M. Aurel Nagy<sup>2</sup>, Liwang Liu<sup>1</sup>, Shane M. Bemiller<sup>5</sup>, Ki-Wook Kim<sup>6</sup>, Sergio A. Lira<sup>7</sup>, Bruce T. Lamb<sup>5</sup>, Andrew R. Tapper<sup>1</sup>, Richard M. Ransohoff<sup>8</sup>, Michael E. Greenberg<sup>2</sup>, Anne Schaefer<sup>3,4</sup> and Dorothy P. Schafer<sup>1\*</sup>

<sup>1</sup>Department of Neurobiology, Brudnick Neuropsychiatric Research Institute, University of Massachusetts Medical School, Worcester, MA, USA.

<sup>2</sup>Department of Neurobiology, Harvard Medical School, Boston, MA, USA. <sup>3</sup>Fishberg Department of Neuroscience, Department of Psychiatry, Friedman Brain Institute, Icahn School of Medicine at Mount Sinai, New York, NY, USA. <sup>4</sup>Ronald M. Loeb Center for Alzheimer's Disease, Icahn School of Medicine at Mount Sinai, New York, NY, USA. <sup>5</sup>Stark Neurosciences Research Institute, Indiana University, Indianapolis, IN, USA. <sup>6</sup>Department of Pharmacology and Center for Stem Cell and Regenerative Medicine, University of Illinois College of Medicine, Chicago, IL, USA. <sup>7</sup>Precision Immunology Institute, Icahn School of Medicine at Mount Sinai, New York, NY, USA. <sup>8</sup>Third Rock Ventures, Boston, MA, USA. <sup>9</sup>These authors contributed equally: Lucas Cheadle, Kasey M. Johnson. \*e-mail: [Dorothy.schafer@umassmed.edu](mailto:Dorothy.schafer@umassmed.edu)

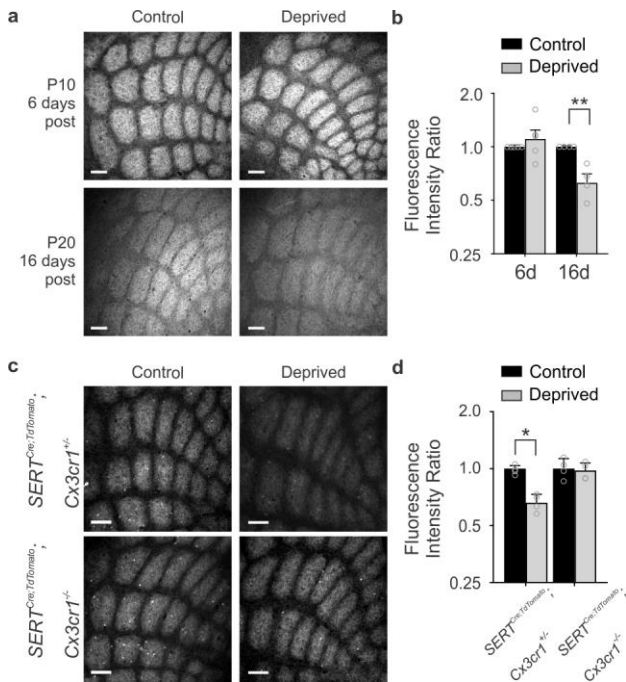

Supplementary Figure 1

**TC input elimination is observed following whisker trimming and with genetic labeling of TC inputs.**

**a**, Daily whisker trimming from P4 results in decreased barrel fluorescence intensity by day 16 (bottom panels), but not by day 6 (top panels). Scale bar, 150  $\mu$ m. **b**, Quantification for barrel fluorescence intensity in **a** (Two-way ANOVA with Sidak's post hoc, 6-day control vs trimmed,  $n = 5$  animals,  $P = 0.5093$ ,  $t = 1.078$ ,  $df = 14$ ; 16-day control vs trimmed,  $n = 4$  animals,  $P = 0.0071$ ,  $t = 3.496$ ,  $df = 14$ ). Data are normalized to the control barrel cortex within the same animal for each timepoint. **c**, TC inputs labeled by transgenic expression of tdTomato are eliminated in the deprived barrel cortex in a CX3CR1-dependent manner following whisker lesioning by cauterization. Representative tangential sections of *Sert-Cre* tdTomato labeled TC inputs within layer IV of the control and deprived barrel cortices of *Cx3cr1<sup>+/+</sup>* (top row) and *Cx3cr1<sup>-/-</sup>* (bottom row) mice 7 d post-sensory deprivation. Scale bar, 150  $\mu$ m. **d**, There is a significant decrease in TC inputs as measured by fluorescence intensity of tdTomato signal in the deprived (gray bars) vs. the contralateral control (black bars) barrel cortex in *Cx3cr1<sup>+/+</sup>* mice 7 d-post deprivation. No significant decrease in fluorescence was observed in *Cx3cr1<sup>-/-</sup>* mice. Data are normalized to the control barrel cortex for each genotype. (Two-Way ANOVA with Sidak's post hoc,  $n=4$  animals per genotype, *Cx3cr1<sup>+/+</sup>* control vs deprived,  $P = 0.0405$ ,  $t = 2.668$ ,  $df = 12$ ; *Cx3cr1<sup>-/-</sup>* control vs deprived,  $P = 0.9808$ ,  $t = 0.1782$ ,  $df = 12$ .) All data presented as mean  $\pm$  SEM.

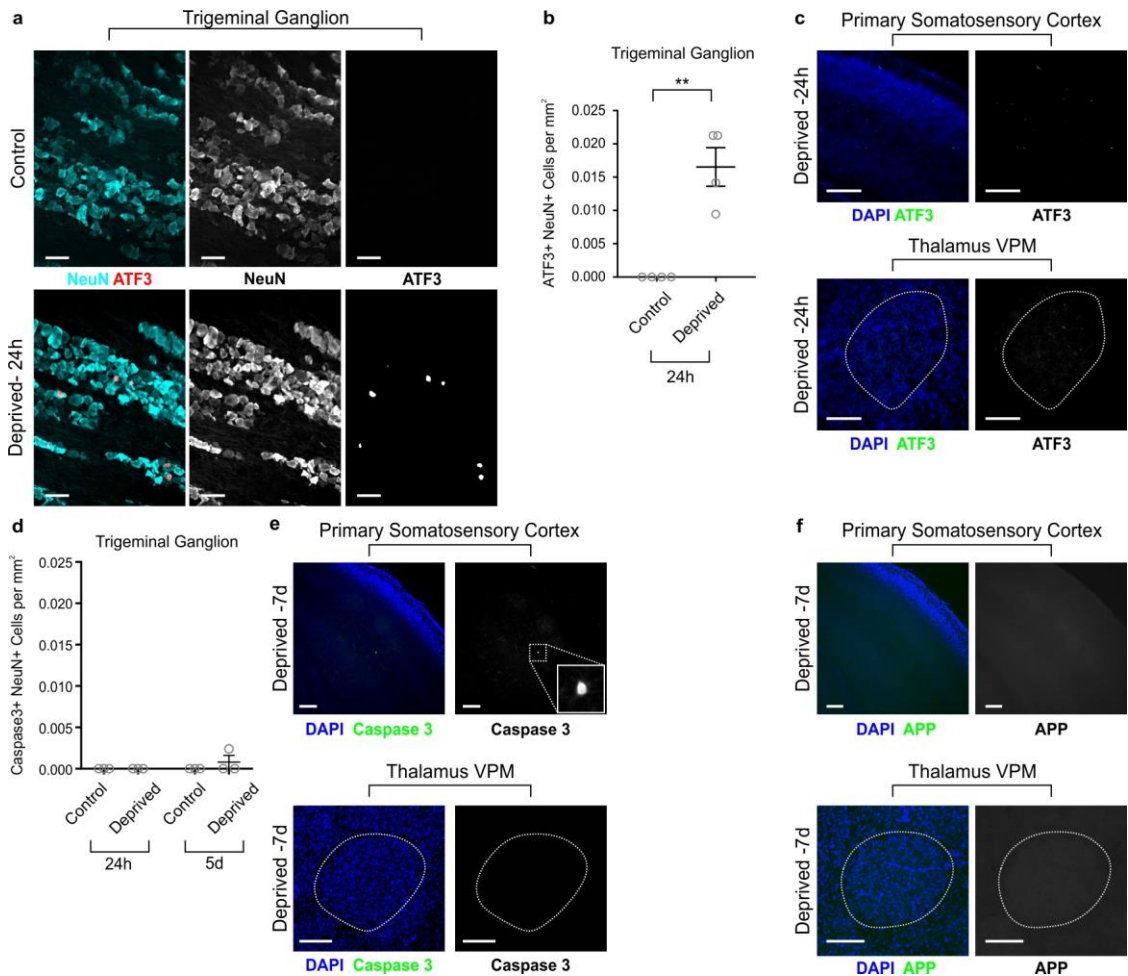

## Supplementary Figure 2

### Effects of whisker lesioning at P4 on cell death, axon degeneration, and cell stress in the barrel cortex circuit.

**a**, Immunostaining of trigeminal ganglia, which contain the neurons that innervate the whisker follicles. There is a significant increase in ATF3 (red, marker of cell stress) in NeuN-positive neurons (cyan) at 24h post whisker lesioning (deprived, bottom row). Scale bar, 50  $\mu$ m. **b**, Quantification for ATF3 signal co-localized to NeuN in the control and deprived trigeminal ganglia. (Two-tailed Student's t-Test,  $n = 4$  animals;  $P = 0.0012$ ,  $t = 5.715$ ,  $df = 6$ ). **c**, Representative images from 3 animals show ATF3 signal (green) is not detected in the ventral posterior medial nucleus (VPM) of the thalamus (bottom panels; dotted line borders the VPM) nor the primary somatosensory cortex (top panels) 24 hours after whisker lesioning. Scale bars, 150  $\mu$ m. **d**, Quantification for cell death marker cleaved caspase 3 shows cell death does not occur 24h nor 5d after whisker lesioning in the trigeminal ganglia. (Two-way ANOVA with Sidak's post hoc, 24h control vs deprived,  $n = 3$  animals,  $P > 0.9999$ ,  $t = 0$ ,  $df = 8$ ; 6d control vs deprived,  $n = 3$  animals,  $P = 0.3520$ ,  $t = 1.414$ ,  $df = 8$ ). Data presented as mean  $\pm$  SEM. **e-f**, Representative images from the deprived somatosensory cortex and VPM 7 days after whisker lesioning in control mice shows no increased cell death (**e**; caspase 3, green) nor axon degeneration (**f**; APP, green) in either brain region. Scale bars, 150  $\mu$ m.

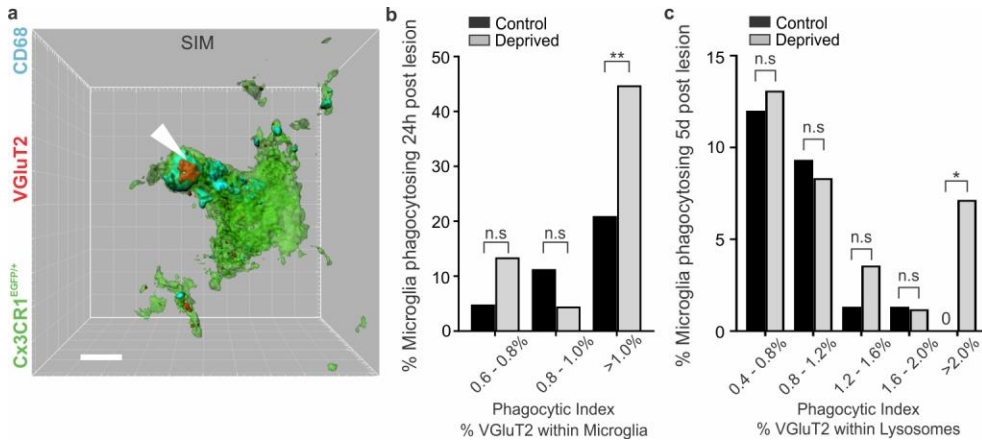

### Supplementary Figure 3

#### Super resolution imaging reveals TC inputs are internalized within microglia following sensory deprivation.

**a**, Structured illumination microscopy (SIM) of a microglia ( $CX3CR1^{EGFP/+}$ , green) which has engulfed VGlut2-positive TC presynaptic inputs (red) within its lysosomes (anti-CD68, cyan) in the deprived barrel cortex 24 h after whisker removal. Scale bar, 5  $\mu$ m. **b-c**, Quantification of the % of microglia out of the total microglial population phagocytosing VGlut2-positive inputs 24h (b) and 5d (c) after whisker lesioning in the control (black bars) and deprived (grey bars) cortices. Microglia in the deprived cortex both 24h and 5d after lesioning have a higher proportion of cells with a high phagocytic index (b, >1.0%; c, >2.0%) compared to the control cortex (24h: n = 129 cells; Two-Sided Fisher's Exact Test; for 0.6-0.8%;  $P = 0.1306$ ; for 0.8-1.0%;  $P = 0.1941$ ; for >0.1%,  $P = 0.0051$ ; 5d: n = 159 cells; Two-Sided Fisher's Exact Test; for 0.4-0.8%;  $P > 0.9999$ ; for 0.8-1.2%;  $P > 0.9999$ ; for 1.2-1.6%;  $P = 0.6227$ ; for 1.6-2.0%;  $P > 0.9999$ ; for >2.0%  $P = 0.0298$ ). Data represented as whole number percentage of the total cell population.

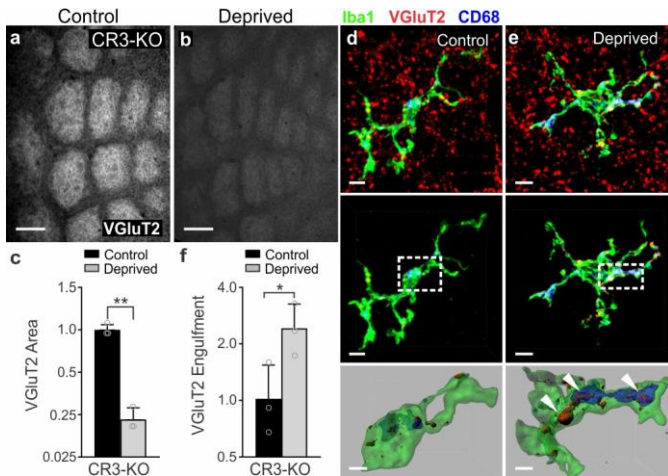

**Supplementary Figure 4**

**CR3 is not required for whisker lesion-induced TC input engulfment and elimination.**

**a,b**, Representative images of VGLuT2 immunoreactivity in the non-deprived (**a**) and deprived (**b**) barrel cortices of CR3-KO mice show TC inputs are properly eliminated 6 d after whisker lesioning. Scale bar, 150  $\mu$ m. **c**, Quantification of VGLuT2 area within barrel centers 7 d after whisker removal reveals that TC inputs are still eliminated in CR3-KO mice. (Data normalized to the control, non-deprived VGLuT2 area within each animal; Two-tailed Student's t-test,  $n = 3$  animals,  $P = 0.0015$ ,  $t = 7.765$   $df = 4$ ). **d,e**, Top Panels, Fluorescent images of microglia within the control (**d**) and deprived (**e**) barrels of CR3-KO mice. Scale bar, 5  $\mu$ m. Middle panels depict VGLuT2 signal (red) within microglia (green) and within lysosomes (blue). Bottom panels are 3D surface-rendered insets (dotted boxes in middle panels) of control (**d**) and deprived (**e**) CR3-KO microglia. Arrows depict increased VGLuT2 internalization within microglia in the deprived hemisphere. Scale bar, 2  $\mu$ m. **f**, Quantification of VGLuT2 engulfment within CR3-KO microglia 24 h after whisker removal reveals that CR3 deficiency fails to block microglial engulfment of TC inputs. (Data normalized to engulfment in microglia in the control hemisphere within each animal; Two-tailed Student's t-test,  $n = 3$  animals,  $P = 0.260$ ,  $t = 4.215$   $df = 2$ ). All data presented as mean  $\pm$  SEM.

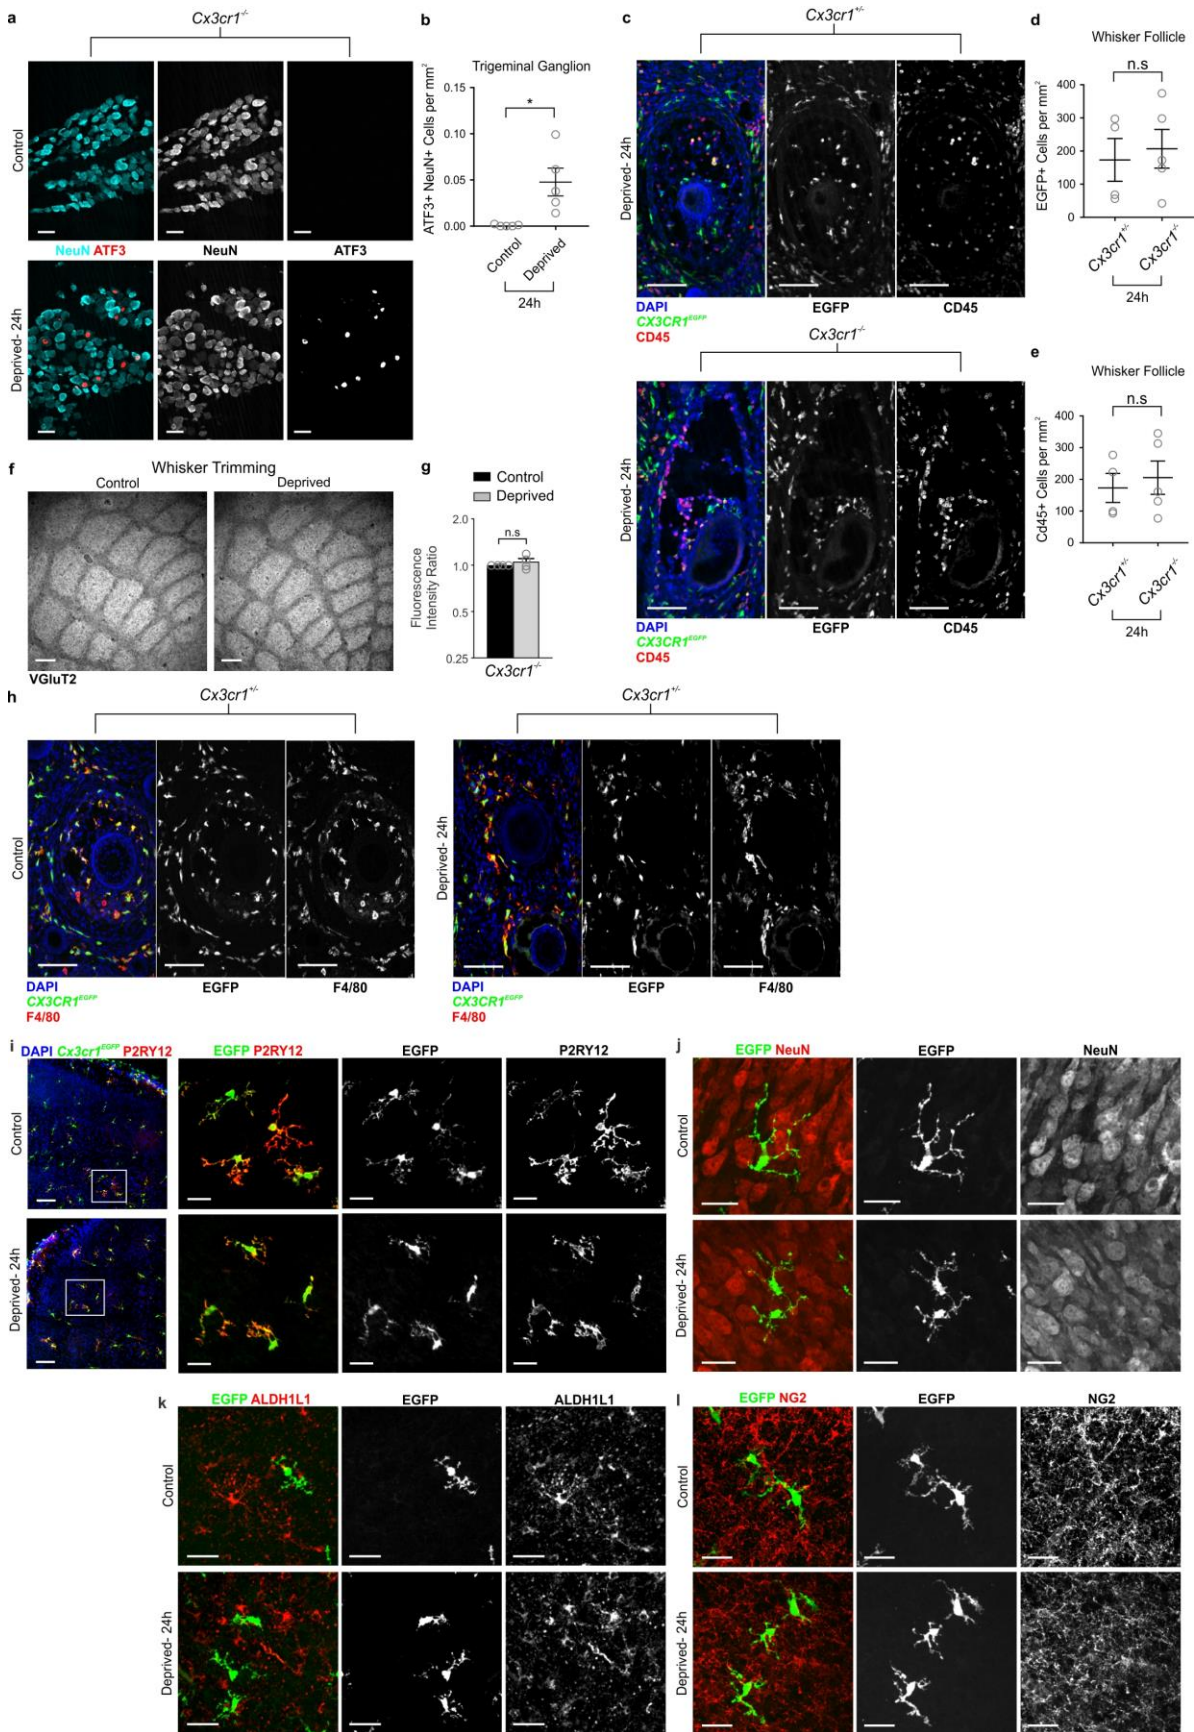

## Supplementary Figure 5

### Whisker lesioning in *Cx3cr1*<sup>-/-</sup> animals results in similar cell stress response and wound healing at the whisker follicles compared to *Cx3cr1*<sup>+/-</sup> animals.

**a-b**, Whisker lesioning increases ATF3 signal in the ipsilateral trigeminal nerve ganglion of *Cx3cr1*<sup>-/-</sup> animals (deprived, bottom panels, compare to Supplementary Figure 2a). Nuclei positive for ATF3 (red) are co-localized to NeuN signal (cyan). Scale bar, 50  $\mu$ m. (Two-tailed Student's t-Test,  $P = 0.0152$ ,  $t = 3.362$ ,  $df = 6$ ;  $n = 5$  animals). **c-e**, Whisker lesioning in *Cx3cr1*<sup>-/-</sup> mice (bottom panels) results in similar wound healing response as measured by recruitment of CX3CR1-EGFP-positive (d; Two-tailed Student's t-Test,  $P = 0.7115$ ,  $t = 0.3852$ ,  $df = 7$ ;  $n = 4$  *Cx3cr1*<sup>+/-</sup>, 5 *Cx3cr1*<sup>-/-</sup> animals) and CD45 macrophages/monocytes (e; Two-tailed Student's t-Test,  $P = 0.6656$ ,  $t = 0.4511$ ,  $df = 7$ ;  $n = 4$  *Cx3cr1*<sup>+/-</sup>, 5 *Cx3cr1*<sup>-/-</sup> animals) compared to *Cx3cr1*<sup>+/-</sup> animals (top panels) 24 hours after injury. Scale bars, 100  $\mu$ m. Data presented as mean  $\pm$  SEM. **f-g**, Whisker trimming in *Cx3cr1*<sup>-/-</sup> animals from P4 to P20 (16 days deprivation) does not result in a decrease in barrel fluorescence intensity (compare to Supplementary Figure 1a-b). Top panel, control barrel field fluorescence; bottom panel, deprived barrel field fluorescence at P20. Representative images taken from 4 animals. Quantification for fluorescence intensity (g) does not show a significant decrease in fluorescence (Two-tailed Student's t-test,  $n = 4$  animals,  $P = 0.3455$ ,  $t = 1.024$ ,  $df = 6$ ). Data presented as mean  $\pm$  SEM. **h**, *Cx3cr1* expression is specific to peripheral macrophages and monocytes in the whisker follicles and surrounding tissue before (left panels) and after (right panels) whisker lesioning in a *Cx3cr1*<sup>-/-</sup> animal. *Cx3cr1EGFP* expression (EGFP, green) is co-localized with macrophage marker F4/80 (red) in both control and cauterized follicles. Scale bars, 100  $\mu$ m. Representative images taken from 9 animals ( $n = 4$  *Cx3cr1*<sup>+/-</sup>, 5 *Cx3cr1*<sup>-/-</sup> animals). **i-l**, *Cx3cr1* expression is specific to microglia both before (control, top panels) and 24 hours after (deprived, bottom panels) whisker lesioning in the primary somatosensory cortex. *Cx3cr1EGFP* expression is specific to microglia (i, P2RY12, low magnification scale bars 80  $\mu$ m, high magnification scale bars 25  $\mu$ m) but not neuronal (j, NeuN, scale bars 25  $\mu$ m), astrocyte (k, ALDH1L1, scale bars 25  $\mu$ m), or oligodendrocyte precursor (l, NG2, scale bars 25  $\mu$ m) specific markers. Representative images taken from 3 *Cx3cr1*<sup>-/-</sup> animals.

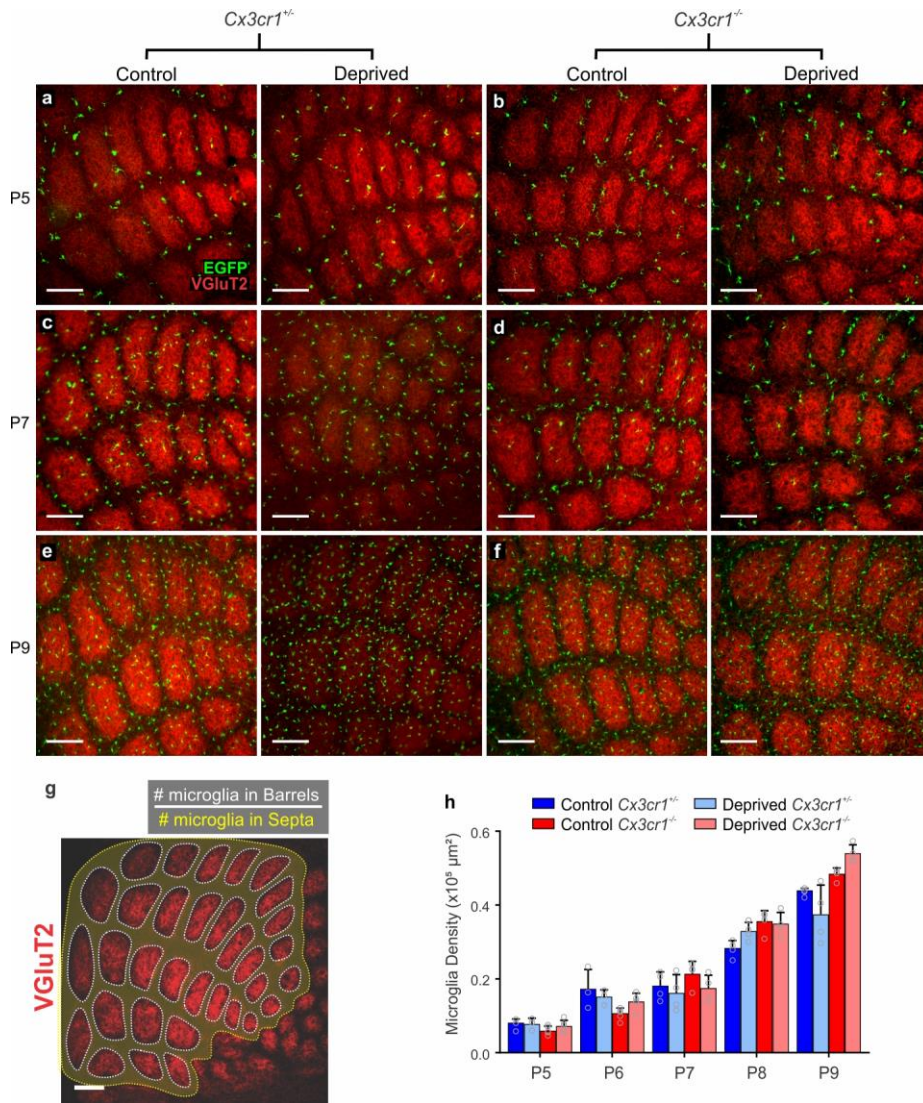

**Supplementary Figure 6**

**Total number of microglia across the barrel field increases with postnatal age and is similar in *Cx3cr1*<sup>+/-</sup> and *Cx3cr1*<sup>-/-</sup> mice.**

**a-f**, Uncropped images of microglia recruitment to barrel centers from Figure 5. Scale bar, 150 μm. Representative images taken from 11 animals. **g**, For each genotype, the number of microglia within the septa (yellow highlighted area) and barrels (outlined by white dotted lines) were quantified in deprived and control, non-deprived layer IV barrel cortices. A ratio was then calculated: # of microglia within the barrel divided by the # of microglia within the septa. Scale bar, 150 μm. **h**, For each postnatal age analyzed, the total microglial cell density over the entire layer IV primary somatosensory cortex is not significantly changed between *Cx3cr1*<sup>+/-</sup> and *Cx3cr1*<sup>-/-</sup> mice. (Two-Way ANOVA with Dunnett's post hoc test, n=4 animals per genotype; for P5: control +/- vs deprived +/-,  $P = 0.9997$ ,  $q = 0.06821$ ,  $df = 60$ , control +/- vs control -/-,  $P = 0.9371$ ,  $q = 0.4673$ ,  $df = 60$ , control +/- vs deprived -/-,  $P = 0.9949$ ,  $q = 0.1929$ ,  $df = 60$ ; for P6: control +/- vs deprived +/-,  $P = 0.9549$ ,  $q = 0.4136$ ,  $df = 60$ , control +/- vs control -/-,  $P = 0.3484$ ,  $q = 1.436$ ,  $df = 60$ , control +/- vs deprived -/-,  $P = 0.7974$ ,  $q = 0.7459$ ,  $df = 60$ ; for P7: control +/- vs deprived +/-,  $P = 0.9468$ ,  $q = 0.4392$ ,  $df = 60$ , control +/- vs control -/-,  $P = 0.8091$ ,  $q = 0.7266$ ,  $df = 60$ , control +/- vs deprived -/-,  $P = 0.9979$ ,  $q = 0.1442$ ,  $df = 60$ ; for P8: control +/- vs deprived +/-,  $P = 0.5973$ ,  $q = 1.043$ ,  $df = 60$ , control +/- vs control -/-,  $P = 0.2481$ ,  $q = 1.639$ ,  $df = 60$ , control +/- vs deprived -/-,  $P = 3.194$ ,  $q = 1.490$ ,  $df = 60$ ; for P9: control +/- vs deprived +/-,  $P = 0.3258$ ,  $q = 1.479$ ,  $df = 60$ , control +/- vs control -/-,  $P = 0.6219$ ,  $q = 1.008$ ,  $df = 60$ , control +/- vs deprived -/-,  $P = 0.0694$ ,  $q = 2.269$ ,  $df = 60$ ). All data presented as mean ± SEM.



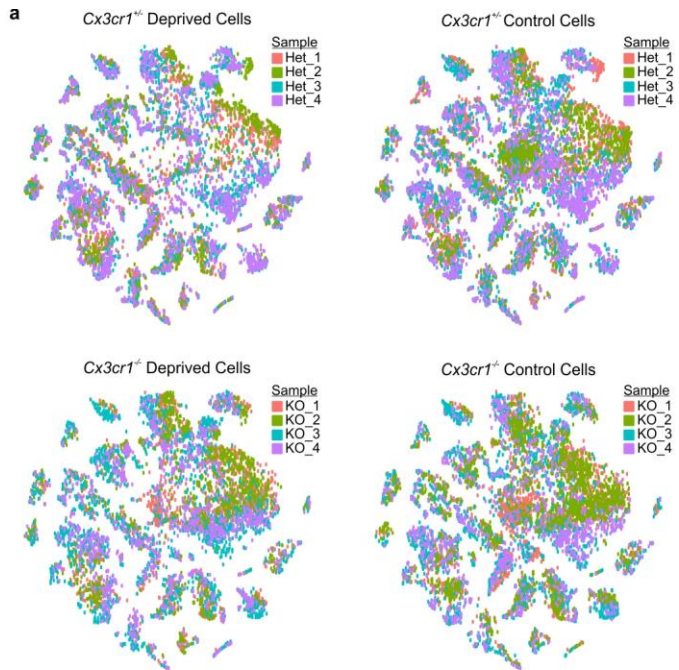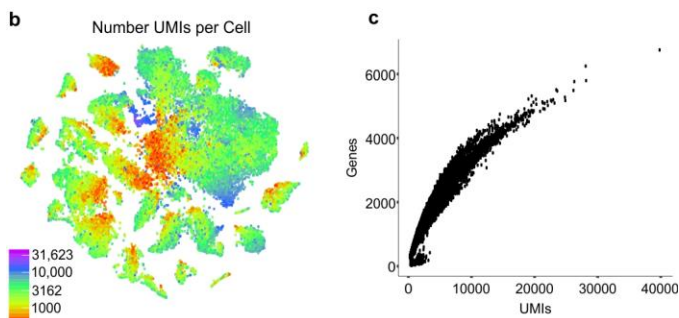

**d**

|         | Reads   | Reads with unique alignment | Reads with no alignments | UMIFM   |
|---------|---------|-----------------------------|--------------------------|---------|
| Mouse01 | 5131.28 | 2952.705359                 | 1962.24287               | 1642.79 |
| Mouse02 | 7192.32 | 3777.569744                 | 3162.182974              | 1893.78 |
| Mouse03 | 7324.4  | 4413.287984                 | 2663.654332              | 1881.9  |
| Mouse04 | 7508.27 | 4705.885216                 | 2555.412059              | 1605.41 |
| Mouse05 | 8392.64 | 4515.337675                 | 3557.100172              | 2192.74 |
| Mouse06 | 3701.45 | 2298.715843                 | 1261.619289              | 1526.6  |
| Mouse07 | 9334.52 | 5821.114634                 | 3206.723902              | 2346.93 |
| Mouse08 | 5222.92 | 3202.010429                 | 1843.785889              | 1687.41 |
| Mouse09 | 12628.7 | 8791.609852                 | 3401.364916              | 3276.6  |
| Mouse10 | 11396.9 | 7830.870018                 | 3153.854077              | 3031.85 |
| Mouse11 | 8884.22 | 6360.826473                 | 2210.066183              | 2783.4  |
| Mouse12 | 14058   | 9797.345388                 | 3786.499526              | 3215.88 |
| Mouse13 | 13746.8 | 9685.512426                 | 3605.394877              | 3499.86 |
| Mouse14 | 11478.6 | 8073.456325                 | 3011.768951              | 3179.17 |
| Mouse15 | 4042.12 | 2758.699306                 | 1134.021612              | 1960.2  |
| Mouse16 | 11004.2 | 7639.631287                 | 3006.15713               | 3021.2  |

## Supplementary Figure 7

### Biological replicate contribution and sequencing depth of cells captured by inDrops.

**a**, Clustering cells from each animal condition across  $n = 4$  *Cx3cr1*<sup>+/+</sup> and  $n = 4$  *Cx3cr1*<sup>-/-</sup> animals reveals even distribution of cells from each animal across all identified cell populations. Each tSNE plot represents cells from each animal genotype and condition (*Cx3cr1*<sup>+/+</sup> control, *Cx3cr1*<sup>+/+</sup> deprived, *Cx3cr1*<sup>-/-</sup> control, *Cx3cr1*<sup>-/-</sup> deprived). **b**, The number of unique molecular identifiers (UMIs) per cell processed by inDrops single-cell RNAseq (logarithmic scale) across  $n = 4$  *Cx3cr1*<sup>+/+</sup> and  $n = 4$  *Cx3cr1*<sup>-/-</sup> animals. **c**, The number of genes positively identified increases with increasing UMIs. **d**, Table containing average number of reads per cell across individual animals.

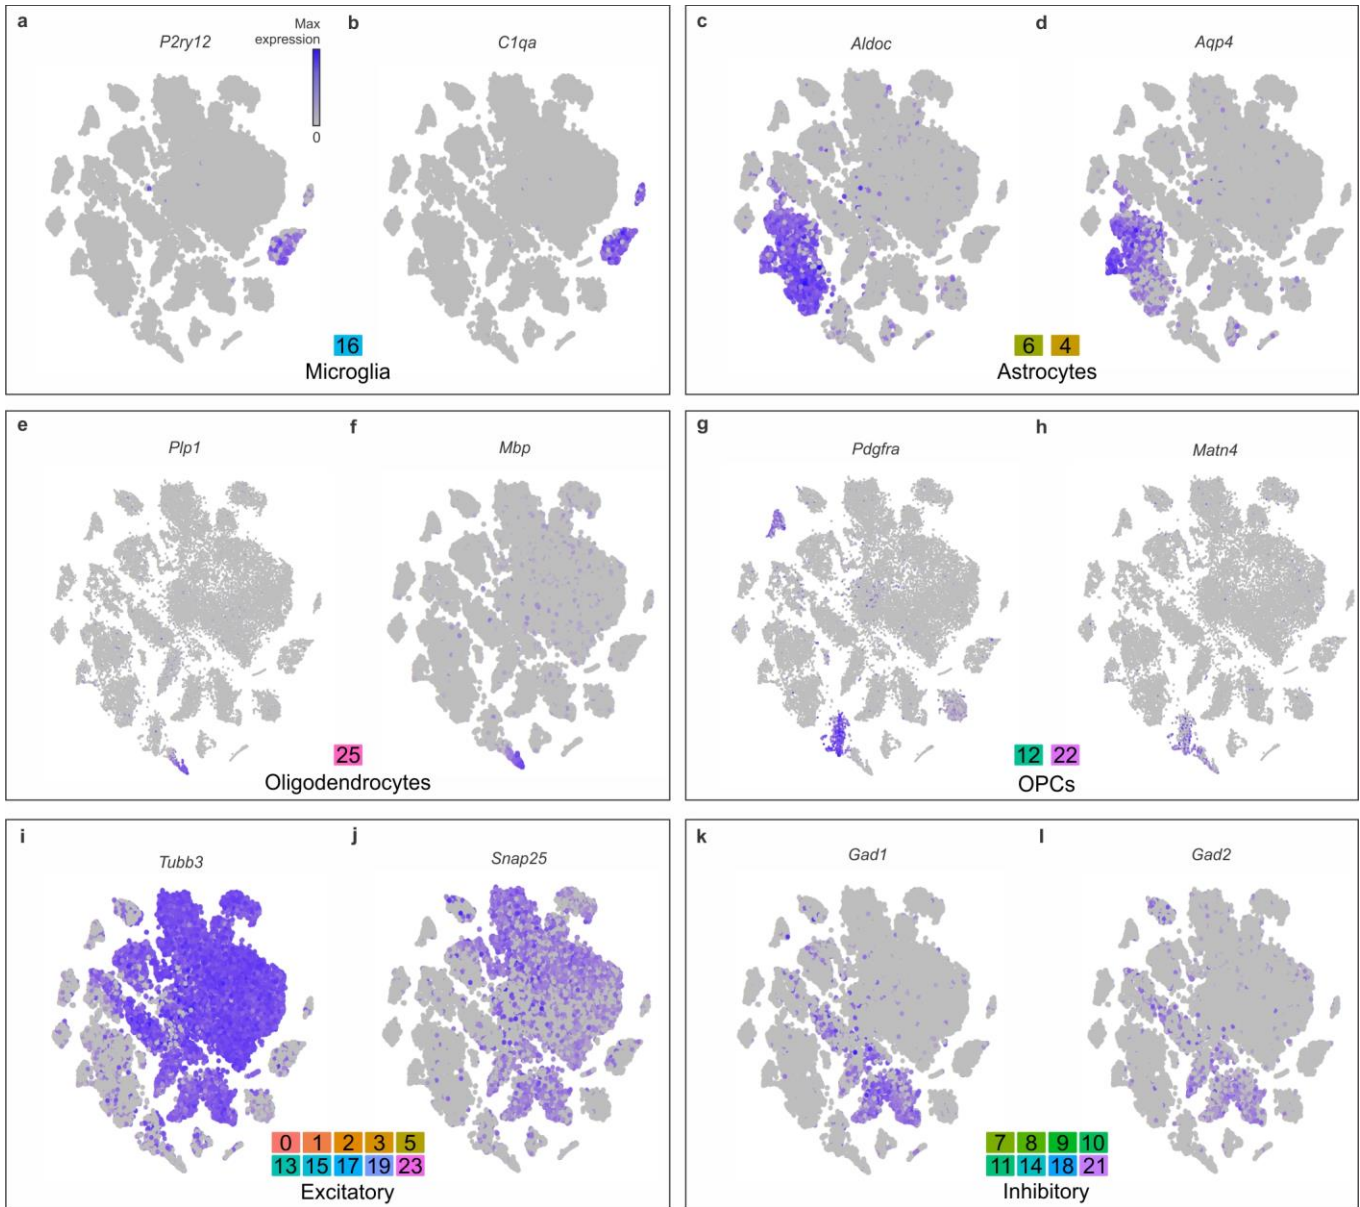

**Supplementary Figure 8**

**Cell populations clustered through principal component analysis were identified according to specific cell-type markers.**

**a-b**, Microglia cluster identified by *P2ry12* and *C1qa*. **c-d**, Astrocyte clusters identified by *Aldoc* and *Aqp4* expression. **e-f**, Oligodendrocyte cluster identified by *Plp1* and *Mbp* expression. **e-f**, Oligodendrocyte precursor cell clusters identified by *Pdgfra* and *Matn4* expression. **i-j**, Neuron clusters identified by *Tubb3* and *Snap25* expression. **k-l**, Inhibitory neurons identified by *Gad1* and *Gad2* expression. All cells represented across  $n = 4$  *Cx3cr1*<sup>+/+</sup> and  $n = 4$  *Cx3cr1*<sup>-/-</sup> animals.



## Supplementary Figure 9

### Genes significantly changed for each cell population in the deprived cortex of *Cx3cr1*<sup>+/-</sup> animals.

Genes with significant changes in expression (FDR <0.10) and Log<sub>2</sub> Fold Change greater than 0.5 or less than -0.5 in the deprived cortex for n = 4 *Cx3cr1*<sup>+/-</sup> are plotted for every identified cell population (Monocle2). Note ADAM10 (bold text and asterisks) is only significantly increased in layer IV excitatory neurons and microglia (outlined graphs).

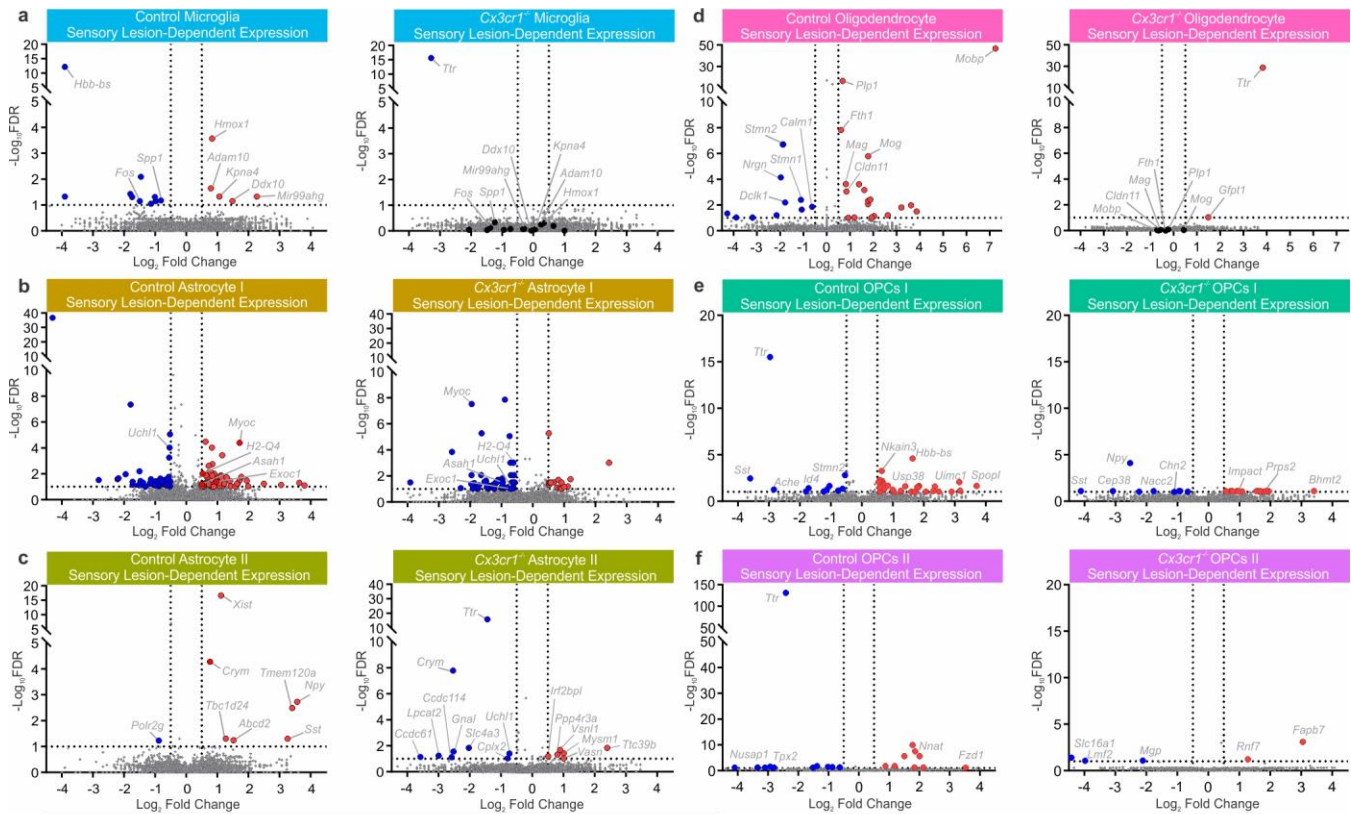

| Cluster # | Cell type         | HET Control | HET Deprived | KO Control | KO Deprived |
|-----------|-------------------|-------------|--------------|------------|-------------|
| 0         | Excitatory        | 783         | 549          | 847        | 803         |
| 1         | Excitatory        | 773         | 459          | 946        | 804         |
| 2         | Excitatory        | 1135        | 415          | 873        | 438         |
| 3         | Excitatory        | 697         | 562          | 781        | 724         |
| 4         | Astrocytes        | 668         | 671          | 554        | 519         |
| 5         | Excitatory        | 393         | 245          | 563        | 448         |
| 6         | Astrocytes        | 445         | 474          | 348        | 346         |
| 7         | Inhibitory        | 382         | 324          | 465        | 343         |
| 8         | Inhibitory        | 411         | 392          | 329        | 362         |
| 9         | Inhibitory        | 490         | 476          | 269        | 242         |
| 10        | Inhibitory        | 422         | 368          | 309        | 275         |
| 11        | Inhibitory        | 343         | 281          | 313        | 232         |
| 12        | OPCs              | 290         | 311          | 209        | 197         |
| 13        | Excitatory        | 258         | 241          | 209        | 230         |
| 14        | Inhibitory        | 235         | 260          | 270        | 123         |
| 15        | Excitatory        | 165         | 184          | 292        | 234         |
| 16        | Microglia         | 264         | 282          | 166        | 116         |
| 17        | Excitatory        | 180         | 287          | 195        | 37          |
| 18        | Inhibitory        | 188         | 180          | 188        | 99          |
| 19        | Excitatory        | 109         | 180          | 161        | 203         |
| 20        | Endothelial Cells | 109         | 182          | 145        | 117         |
| 21        | Inhibitory        | 87          | 112          | 211        | 84          |
| 22        | OPCs              | 89          | 169          | 65         | 73          |
| 23        | Excitatory        | 80          | 83           | 134        | 99          |
| 24        | Pericytes         | 116         | 153          | 55         | 55          |
| 25        | Oligodendrocytes  | 96          | 109          | 58         | 47          |
| 26        | Macrophages       | 64          | 78           | 53         | 33          |
| 27        | Unknown           | 62          | 60           | 23         | 59          |
| SUM       |                   | 9334        | 8087         | 9031       | 7342        |

**Supplementary Figure 10**

**Sensory-lesion dependent gene expression changes in all major glial cell populations in the deprived cortices of  $Cx3cr1^{+/−}$  and  $Cx3cr1^{-/-}$  animals.**

**a**, Gene expression changes for  $Cx3cr1^{+/−}$  microglia (left panel, from  $n = 4$   $Cx3cr1^{+/−}$  animals) and  $Cx3cr1^{-/-}$  microglia (right panel, from  $n = 4$   $Cx3cr1^{-/-}$  animals). Dotted lines indicates  $-\log_{10}FDR < 0.10$  and  $\text{Log}_2$  Fold Change  $> 0.5$  and  $< -0.5$  (Monocle2). **b-f**, Gene

expression changes for all other identified glial cell types (Monocle2). **g**, Table containing the number of cells sequenced for each cell type for each animal genotype and condition. **h**, Heatmap for the Log<sub>2</sub>Fold Change for microglial genes changed across n = 4 *Cx3cr1<sup>+/-</sup>* and n = 4 *Cx3cr1<sup>-/-</sup>* animals hierarchically clustered by variable gene expression for *Cx3cr1<sup>+/-</sup>* samples (Monocle2).

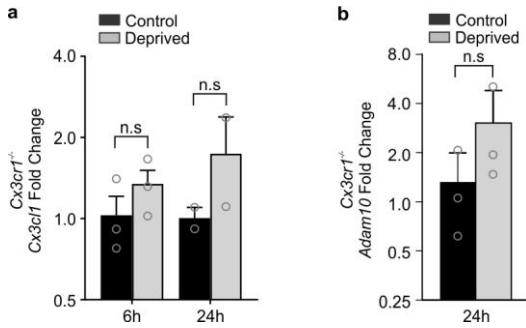

**Supplementary Figure 11**

**qPCR in *Cx3cr1*<sup>-/-</sup> primary somatosensory cortex reveals no significant increase in *Cx3cl1* nor *Adam10* expression after whisker lesioning.**

**a**, Quantification for *Cx3cl1* expression 6h and 24h post lesioning. (Two-way ANOVA with Sidak's post hoc, 6h control vs deprived  $P = 0.6640$ ,  $t = 0.8648$ ,  $df = 6$ ; 24h control vs deprived  $P = 0.2808$ ,  $t = 1.641$ ,  $df = 6$ ;  $n = 3$  animals per timepoint). **b**, Quantification for *Adam10* expression 24h post lesioning. (Two-tailed Student's t-Test,  $P = 0.4414$ ,  $t = 0.9099$ ,  $df = 4$ ;  $n = 3$  animals). Data presented as mean  $\pm$  SEM.

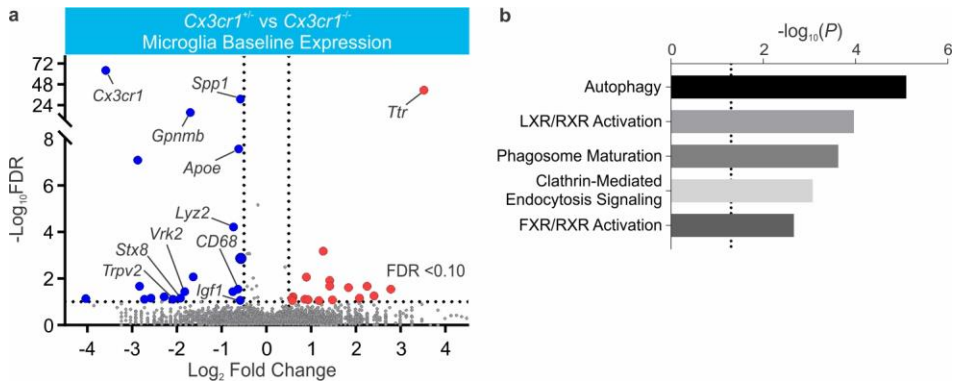

**Supplementary Figure 12**

**Baseline expression in *Cx3cr1*<sup>-/-</sup> microglia reveals significant changes in genes related to phagocytic signaling.**

**a**, Volcano plot of genes significantly downregulated (fold change < -0.5, FDR < 0.10,  $p < 0.0005$ , Monocle2) in *Cx3cr1*<sup>-/-</sup> microglia within the non-deprived, control barrel cortex compared to *Cx3cr1*<sup>+/+</sup> littermates reveals several genes are dysregulated basally in *Cx3cr1*<sup>-/-</sup> microglia. (Microglia from  $n = 4$  *Cx3cr1*<sup>+/+</sup> and  $n = 4$  *Cx3cr1*<sup>-/-</sup> animals). **b**, Gene ontology clustering of genes in *Cx3cr1*<sup>-/-</sup> microglia (Dotted line,  $p < 0.05$ ) reveals several genes related to phagocytic signaling are significantly changed (single cell performed on  $n = 4$  *Cx3cr1*<sup>+/+</sup> and  $n = 4$  *Cx3cr1*<sup>-/-</sup> animals yielding 828 microglia, see also Supplementary Figure 9g). Data analyzed through the use of IPA (QIAGEN Inc., <https://www.qiagenbioinformatics.com/products/ingenuitypathway-analysis>).
